# Supplementary material
Source: Springer Nature journal article supplement (https://www.springermedizin.de/resource/supplementary/12913_2011_2002_MOESM2_ESM.PDF/9530614)
Supplement: MOESM2 [file 9530614]

**BIOGRAPHICAL**

Please answer the following questions about your background.

1. How do you best describe your agency/organization?
  - State Central Office
  - District Health Office
  - Local Public Health Office
  - Other (please specify)
  
2. Please indicate the district office where you are located.
  - 1
  - 2
  - 3
  - 4
  - 5
  - 6
  - 7
  - 8
  - 9
  
3. Though you may work in several capacities, which do you consider your primary position? (**Required**)
  - District Administrator
  - District Health Officer
  - Office Director
  - Health Educator
  - Epidemiologist
  - Bureau Director
  - Deputy Bureau Director
  - Division Director
  - Branch Director
  - Health Program Specialist
  - Nurse
  - Social Worker
  - Dietitian/Nutritionist
  - Other (please specify)

4. Please indicate which of the following describes your role as nurse:
- Nurse
  - Chief Nurse
  - Epidemiology Nurse
  - Surveillance Nurse
  - Immunization Nurse
  - Maternal and Child Health Nurse
5. On average, what percentage of your work relates to chronic disease prevention?  
**(Required)**
- \_\_\_\_\_
6. In what program area or areas do you specialize? (Check all that apply) **(Required)**
- Diabetes
  - Obesity
  - Physical Activity
  - Diet/Nutrition
  - Cancer Prevention and Control
  - Tobacco
  - Cardiovascular Health
  - Arthritis
  - Asthma
  - Infectious Diseases
  - School Health
  - Women's Health, including Maternal and Child Health
  - Environmental Health
  - Vision Preservation
  - Healthy Aging
  - Osteoporosis
  - Other (please specify)
7. How long have you worked for this agency/organization?
- \_\_\_\_ Years  
\_\_\_\_ Months
8. How long have you been in your current position?
- \_\_\_\_ Years  
\_\_\_\_ Months

9. How long have you been involved in public health overall?

\_\_\_\_ Years  
\_\_\_\_ Months

10. What is the most advanced degree you have completed?

- High school or GED equivalent
- Some college
- Bachelor's degree
- BSN
- RN
- Nurse Practitioner
- MPH or MSPH
- MS, MA, or other masters degree
- DrPH
- PhD
- MD
- Other (please specify)

11. Please indicate your gender.

- Male
- Female

### EVIDENCE-BASED DECISION MAKING

The next set of questions asks about evidence-based decision making. For the purposes of this survey, we think that evidence-based decision making involves the development, implementation, and evaluation of effective programs and policies in public health through:

- The systematic use of data and information systems
- The application of principles of scientific reasoning coupled with community engagement
- The appropriate use of behavioral science theory and program planning models

12. Based on your experience and best judgment, what percentage of all programs in your agency is evidence-based?

\_\_\_\_\_

13. Based on your experience and best judgment, what percentage of all **chronic disease** programs in your agency is evidence-based?

\_\_\_\_\_

14. What are some of the barriers to using evidence-based interventions or making evidence-based decisions that you have encountered?
15. In your opinion, what is the one thing that most needs to happen in your agency to increase the use of evidence-based decision making?

Please indicate the extent to which you agree or disagree with the following statement. Use the scale below to respond to each item by filling in the circle that best represents your response.

16. I feel that I have the skills necessary for developing evidence-based chronic disease control programs.

| <b>Strongly Disagree</b> |                       |                       |                       |                       |                       |                       |                       |                       |                       | <b>Strongly Agree</b> |  |
|--------------------------|-----------------------|-----------------------|-----------------------|-----------------------|-----------------------|-----------------------|-----------------------|-----------------------|-----------------------|-----------------------|--|
| <b>0</b>                 | <b>1</b>              | <b>2</b>              | <b>3</b>              | <b>4</b>              | <b>5</b>              | <b>6</b>              | <b>7</b>              | <b>8</b>              | <b>9</b>              | <b>10</b>             |  |
| <input type="radio"/>    | <input type="radio"/> | <input type="radio"/> | <input type="radio"/> | <input type="radio"/> | <input type="radio"/> | <input type="radio"/> | <input type="radio"/> | <input type="radio"/> | <input type="radio"/> | <input type="radio"/> |  |

17. Who expects you to use evidence-based decision making related to public health program planning? Please check all that apply.

- Health department leaders  
 Direct supervisor  
 Co-workers  
 Community partners  
 Other (please specify)

18. Who expects you to use evidence-based decision making related to *chronic disease* program planning? Please check all that apply.

- Health department leaders  
 Direct supervisor  
 Co-workers  
 Community partners  
 Other (please specify)











33. Targeted workshops that would address significant barriers to using evidence-based interventions (e.g., economic evaluation, quantitative skills, translating evidence-based interventions).

| Least likely to use   |                       |                       |                       |                       |                       |                       |                       |                       |                       | Most likely to use    |  |
|-----------------------|-----------------------|-----------------------|-----------------------|-----------------------|-----------------------|-----------------------|-----------------------|-----------------------|-----------------------|-----------------------|--|
| 0                     | 1                     | 2                     | 3                     | 4                     | 5                     | 6                     | 7                     | 8                     | 9                     | 10                    |  |
| <input type="radio"/> | <input type="radio"/> | <input type="radio"/> | <input type="radio"/> | <input type="radio"/> | <input type="radio"/> | <input type="radio"/> | <input type="radio"/> | <input type="radio"/> | <input type="radio"/> | <input type="radio"/> |  |

34. Individualized technical consultation that would address barriers to using evidence-based interventions (e.g., one-on-one phone consultation).

| Least likely to use   |                       |                       |                       |                       |                       |                       |                       |                       |                       | Most likely to use    |  |
|-----------------------|-----------------------|-----------------------|-----------------------|-----------------------|-----------------------|-----------------------|-----------------------|-----------------------|-----------------------|-----------------------|--|
| 0                     | 1                     | 2                     | 3                     | 4                     | 5                     | 6                     | 7                     | 8                     | 9                     | 10                    |  |
| <input type="radio"/> | <input type="radio"/> | <input type="radio"/> | <input type="radio"/> | <input type="radio"/> | <input type="radio"/> | <input type="radio"/> | <input type="radio"/> | <input type="radio"/> | <input type="radio"/> | <input type="radio"/> |  |

35. Distance training opportunities via Webinar or video conference.

| Least likely to use   |                       |                       |                       |                       |                       |                       |                       |                       |                       | Most likely to use    |  |
|-----------------------|-----------------------|-----------------------|-----------------------|-----------------------|-----------------------|-----------------------|-----------------------|-----------------------|-----------------------|-----------------------|--|
| 0                     | 1                     | 2                     | 3                     | 4                     | 5                     | 6                     | 7                     | 8                     | 9                     | 10                    |  |
| <input type="radio"/> | <input type="radio"/> | <input type="radio"/> | <input type="radio"/> | <input type="radio"/> | <input type="radio"/> | <input type="radio"/> | <input type="radio"/> | <input type="radio"/> | <input type="radio"/> | <input type="radio"/> |  |

36. Distance training opportunities via conference call or CD-ROM.

| Least likely to use   |                       |                       |                       |                       |                       |                       |                       |                       |                       | Most likely to use    |  |
|-----------------------|-----------------------|-----------------------|-----------------------|-----------------------|-----------------------|-----------------------|-----------------------|-----------------------|-----------------------|-----------------------|--|
| 0                     | 1                     | 2                     | 3                     | 4                     | 5                     | 6                     | 7                     | 8                     | 9                     | 10                    |  |
| <input type="radio"/> | <input type="radio"/> | <input type="radio"/> | <input type="radio"/> | <input type="radio"/> | <input type="radio"/> | <input type="radio"/> | <input type="radio"/> | <input type="radio"/> | <input type="radio"/> | <input type="radio"/> |  |

37. A peer-to-peer network where you could discuss issues and ideas with colleagues.

| Least likely to use   |                       |                       |                       |                       |                       |                       |                       |                       |                       | Most likely to use    |  |
|-----------------------|-----------------------|-----------------------|-----------------------|-----------------------|-----------------------|-----------------------|-----------------------|-----------------------|-----------------------|-----------------------|--|
| 0                     | 1                     | 2                     | 3                     | 4                     | 5                     | 6                     | 7                     | 8                     | 9                     | 10                    |  |
| <input type="radio"/> | <input type="radio"/> | <input type="radio"/> | <input type="radio"/> | <input type="radio"/> | <input type="radio"/> | <input type="radio"/> | <input type="radio"/> | <input type="radio"/> | <input type="radio"/> | <input type="radio"/> |  |

38. Are there other resources that you would find helpful in using evidence-based decision making? What are they?
